# Supplementary material for: Post-complete-basis-set extrapolation of conventional and explicitly correlated coupled-cluster energies: can the convergence to the CBS limit be diagnosed?
Source: Royal Society of Chemistry journal article supplement (doi:10.1039/d1cp00538c), 2021-01-01
Supplement: d1cp00538c1.pdf [file d1cp00538c1.pdf]

## SUPPLEMENTARY INFORMATION

# Post-complete-basis-set extrapolation of conventional and explicitly correlated coupled-cluster energies: can the convergence to CBS limit be diagnosed?

A.J.C. Varandas<sup>\*,†,‡,¶</sup>

<sup>†</sup>*Department of Physics, Qufu Normal University, China*

<sup>‡</sup>*Department of Physics, Universidade Federal do Espírito Santo, 29075-910 Vitória, Brazil*

<sup>¶</sup>*Department of Chemistry, and Chemistry Centre, University of Coimbra, 3004-535  
Coimbra, Portugal*

E-mail: varandas@uc.pt

Table 1: Systems in A24

| # in A24 | Formula                              | Name                    | # in A24 + TS-106 |
|----------|--------------------------------------|-------------------------|-------------------|
| 1        | NH <sub>3</sub> ··· H <sub>2</sub> O | Ammonia-water           | 1                 |
| 2        | (H <sub>2</sub> O) <sub>2</sub>      | Water dimer             | 2                 |
| 3        | (HCN) <sub>2</sub>                   | Hydrgen-cyanide dimer   | 3                 |
| 4        | (HF) <sub>2</sub>                    | Hydrogen fluoride dimer | 4                 |

Continued on next page

*continued from previous page*

| # in A24 | Formula                                            | Name                | # in A24 + TS-106 |
|----------|----------------------------------------------------|---------------------|-------------------|
| 5        | $(\text{NH}_3)_2$                                  | Ammonia dimer       | 5                 |
| 6        | $\text{CH}_4 \cdots \text{HF}$                     | Methane-HF          | 6                 |
| 7        | $\text{CH}_4 \cdots \text{NH}_3$                   | Methane-ammonia     | 7                 |
| 8        | $\text{CH}_4 \cdots \text{H}_2\text{O}$            | Methane-water       | 8                 |
| 9        | $(\text{CH}_2\text{O})_2$                          | Formaldehyde dimer  | 9                 |
| 10       | $\text{H}_2\text{O} \cdots \text{C}_2\text{H}_4$   | Water-ethene        | 10                |
| 11       | $\text{CH}_2\text{O} \cdots \text{C}_2\text{H}_4$  | Formaldehyde-ethene | 11                |
| 12       | $(\text{C}_2\text{H}_2)_2$                         | Ethyne dimer        | 12                |
| 13       | $\text{NH}_3 \cdots \text{C}_2\text{H}_4$          | Ammonia-ethene      | 13                |
| 14       | $(\text{C}_2\text{H}_4)_2$                         | Ethene dimer        | 14                |
| 15       | $\text{CH}_4 \cdots \text{C}_2\text{H}_4$          | Methane-ethene      | 15                |
| 16       | $\text{BH}_3 \cdots \text{CH}_4$                   | Borane-methane      | 16                |
| 17       | $\text{CH}_4 \cdots \text{C}_2\text{H}_6$          | Methane-ethane      | 17                |
| 18       | $\text{CH}_4 \cdots \text{C}_2\text{H}_6$          | Methane-ethane      | 18                |
| 19       | $(\text{CH}_4)_2$                                  | Methane dimer       | 19                |
| 20       | $\text{CH}_4 \cdots \text{Ar}$                     | Methane-Ar          | 20                |
| 21       | $\text{C}_4\text{H}_4 \cdots \text{Ar}$            | Ethene-Ar           | 21                |
| 22       | $\text{C}_2\text{H}_4 \cdots \text{C}_2\text{H}_2$ | Ethene-ethyne       | 22                |
| 23       | $(\text{C}_2\text{H}_4)_2$                         | Ethene dimer        | 23                |
| 24       | $(\text{C}_2\text{H}_2)_2$                         | Ethyne dimer        | 24                |

Table 2: Systems in TS-106

| # in TS-106 | Formula                        | Name                      | # in A24 + TS-106 |
|-------------|--------------------------------|---------------------------|-------------------|
| 1           | CFN                            | Cyanogen fluoride         | 25                |
| 2           | CFN                            | Isocyanogen fluoride      | 26                |
| 3           | CF <sub>2</sub>                | Singlet difluoromethylene | 27                |
| 4           | CF <sub>2</sub> O              | Carbonyl fluoride         | 28                |
| 5           | CF <sub>4</sub>                | Tetrafluoromethane        | 29                |
| 6           | CHF                            | Singlet fluoromethylene   | 30                |
| 7           | CHFO                           | Formyl fluoride           | 31                |
| 8           | CHF <sub>3</sub>               | Trifluoromethane          | 32                |
| 9           | CHN                            | Hydrogen cyanide          | 33                |
| 10          | CHN                            | Hydrogen isocyanide       | 34                |
| 11          | CHNO                           | Cyanic acid               | 35                |
| 12          | CHNO                           | Isocyanic acid            | 36                |
| 13          | CHNO                           | Formonitrile oxide        | 37                |
| 14          | CHNO                           | Isofulminic acid          | 38                |
| 15          | CH <sub>2</sub>                | Singlet methylene         | 39                |
| 16          | CH <sub>2</sub> F <sub>2</sub> | Difluoromethane           | 40                |
| 17          | CH <sub>2</sub> N <sub>2</sub> | Cyanamide                 | 41                |
| 18          | CH <sub>2</sub> N <sub>2</sub> | 3H-Diazirine              | 42                |
| 19          | CH <sub>2</sub> N <sub>2</sub> | Diazomethane              | 43                |
| 20          | CH <sub>2</sub> O              | Formaldehyde              | 44                |
| 21          | CH <sub>2</sub> O              | Hydroxymethylene          | 45                |
| 22          | CH <sub>2</sub> O <sub>2</sub> | Dioxirane                 | 46                |
| 23          | CH <sub>2</sub> O <sub>2</sub> | Formic acid               | 47                |
| 24          | CH <sub>2</sub> O <sub>3</sub> | Performic acid*           | 48                |

Continued on next page

*continued from previous page*

| # in TS-106 | Formula                                      | Name                 | # in A24 + TS-106 |
|-------------|----------------------------------------------|----------------------|-------------------|
| 25          | CH <sub>3</sub> F                            | Fluoromethane        | 49                |
| 26          | CH <sub>3</sub> N                            | Methanimine          | 50                |
| 27          | CH <sub>3</sub> NO                           | Formamide            | 51                |
| 28          | CH <sub>3</sub> NO <sub>2</sub>              | Methyl nitrite*      | 52                |
| 29          | CH <sub>3</sub> NO <sub>2</sub>              | Nitromethane*        | 53                |
| 30          | CH <sub>4</sub>                              | Methane              | 54                |
| 31          | CH <sub>4</sub> N <sub>2</sub> O             | Urea*                | 55                |
| 32          | CH <sub>4</sub> O                            | Methanol             | 56                |
| 33          | CH <sub>5</sub> N                            | Methylamine*         | 57                |
| 34          | CO                                           | Carbon monoxide      | 58                |
| 35          | CO <sub>2</sub>                              | Carbon dioxide       | 59                |
| 36          | C <sub>2</sub> F <sub>2</sub>                | Difluoroacetylene    | 60                |
| 37          | C <sub>2</sub> F <sub>4</sub>                | Tetrafluoroethylene* | 61                |
| 38          | C <sub>2</sub> HF                            | Fluoroacetylene      | 62                |
| 39          | C <sub>2</sub> HF <sub>3</sub>               | Trifluoroethylene    | 63                |
| 40          | C <sub>2</sub> H <sub>2</sub>                | Acetylene            | 64                |
| 41          | C <sub>2</sub> H <sub>2</sub> F <sub>2</sub> | 1,1-Difluoroethylene | 65                |
| 42          | C <sub>2</sub> H <sub>2</sub> O              | Ketene               | 66                |
| 43          | C <sub>2</sub> H <sub>2</sub> O              | Oxirene              | 67                |
| 44          | C <sub>2</sub> H <sub>2</sub> O <sub>2</sub> | Glyoxal              | 68                |
| 45          | C <sub>2</sub> H <sub>3</sub> F              | Fluoroethylene       | 69                |
| 46          | C <sub>2</sub> H <sub>3</sub> FO             | Acetyl fluoride*     | 70                |
| 47          | C <sub>2</sub> H <sub>3</sub> N              | Acetonitrile*        | 71                |
| 48          | C <sub>2</sub> H <sub>3</sub> N              | Methyl isocyanide*   | 72                |

Continued on next page

*continued from previous page*

| # in TS-106 | Formula                                      | Name              | # in A24 + TS-106 |
|-------------|----------------------------------------------|-------------------|-------------------|
| 49          | C <sub>2</sub> H <sub>4</sub>                | Ethylene          | 73                |
| 50          | C <sub>2</sub> H <sub>4</sub> O              | Acetaldehyde*     | 74                |
| 51          | C <sub>2</sub> H <sub>4</sub> O              | Oxirane*          | 75                |
| 52          | C <sub>2</sub> H <sub>4</sub> O <sub>2</sub> | Acetic acid*      | 76                |
| 53          | C <sub>2</sub> H <sub>4</sub> O <sub>2</sub> | Methyl formate*   | 77                |
| 54          | C <sub>2</sub> H <sub>5</sub> F              | Fluoroethane*     | 78                |
| 55          | C <sub>2</sub> H <sub>5</sub> N              | Aziridine*        | 79                |
| 56          | C <sub>2</sub> H <sub>6</sub>                | Ethane*           | 80                |
| 57          | C <sub>2</sub> H <sub>6</sub> O              | Dimethyl ether*   | 81                |
| 58          | C <sub>2</sub> H <sub>6</sub> O              | Ethanol*          | 82                |
| 59          | C <sub>2</sub> N <sub>2</sub>                | Cyanogen          | 83                |
| 60          | C <sub>3</sub> H <sub>3</sub> N              | Acrylonitrile*    | 84                |
| 61          | C <sub>3</sub> H <sub>4</sub>                | Allene*           | 85                |
| 62          | C <sub>3</sub> H <sub>4</sub>                | Cyclopropene*     | 86                |
| 63          | C <sub>3</sub> H <sub>4</sub>                | Propyne*          | 87                |
| 64          | C <sub>3</sub> H <sub>6</sub>                | Cyclopropane*     | 88                |
| 65          | C <sub>3</sub> H <sub>6</sub>                | Propene*          | 89                |
| 66          | C <sub>3</sub> H <sub>8</sub>                | Propane*          | 90                |
| 67          | C <sub>3</sub> O <sub>2</sub>                | Carbon suboxide   | 91                |
| 68          | C <sub>4</sub> H <sub>4</sub>                | Butatriene*       | 92                |
| 69          | C <sub>4</sub> H <sub>4</sub>                | Cyclobutadiene*   | 93                |
| 70          | C <sub>4</sub> H <sub>4</sub>                | Tetrahedran*      | 94                |
| 71          | C <sub>4</sub> H <sub>4</sub>                | Vinylacetylene*   | 95                |
| 72          | C <sub>4</sub> N <sub>2</sub>                | Dicyanoacetylene* | 96                |

Continued on next page

*continued from previous page*

| # in TS-106 | Formula                         | Name                    | # in A24 + TS-106 |
|-------------|---------------------------------|-------------------------|-------------------|
| 73          | FH                              | Hydrogen fluoride       | 97                |
| 74          | FHO                             | Hypofluorous acid       | 98                |
| 75          | FHO <sub>2</sub>                | Fluoroperoxide          | 99                |
| 76          | FH <sub>2</sub> N               | Monofluoroamine         | 100               |
| 77          | FH <sub>3</sub> N <sub>2</sub>  | Fluorohydrazine*        | 101               |
| 78          | FNO                             | Nitrosyl fluoride       | 102               |
| 79          | F <sub>2</sub>                  | Difluorine              | 103               |
| 80          | F <sub>2</sub> N <sub>2</sub>   | Difluorodiazene (cis)   | 104               |
| 81          | F <sub>2</sub> N <sub>2</sub>   | Difluorodiazene (trans) | 105               |
| 82          | F <sub>2</sub> O                | Difluorine monoxide     | 106               |
| 83          | F <sub>2</sub> O <sub>2</sub>   | Perfluoroperoxide       | 107               |
| 84          | F <sub>3</sub> N                | Trifluoroamine          | 108               |
| 85          | HNO                             | Nitrosylhydride         | 109               |
| 86          | HNO <sub>2</sub>                | Nitrous acid (cis)      | 110               |
| 87          | HNO <sub>2</sub>                | Nitrous acid (trans)    | 111               |
| 88          | HNO <sub>2</sub>                | Nitrous acid            | 112               |
| 89          | HNO <sub>3</sub>                | Nitric acid             | 113               |
| 90          | HN <sub>3</sub>                 | Hydrogen azide          | 114               |
| 91          | H <sub>2</sub> N <sub>2</sub>   | Diazene (cis)           | 115               |
| 92          | H <sub>2</sub> N <sub>2</sub>   | Diazene (trans)         | 116               |
| 93          | H <sub>2</sub> N <sub>2</sub>   | Diazene (iso)           | 117               |
| 94          | H <sub>2</sub> N <sub>2</sub> O | Nitrosamide             | 118               |
| 95          | H <sub>2</sub> O                | Water                   | 119               |
| 96          | H <sub>2</sub> O <sub>2</sub>   | Hydrogen peroxide       | 120               |

Continued on next page

*continued from previous page*

| # in TS-106 | Formula                       | Name                   | # in A24 + TS-106 |
|-------------|-------------------------------|------------------------|-------------------|
| 97          | H <sub>3</sub> N              | Ammonia                | 121               |
| 98          | H <sub>3</sub> NO             | Ammonia oxide          | 122               |
| 99          | H <sub>3</sub> NO             | Hydroxylamine          | 123               |
| 100         | H <sub>4</sub> N <sub>2</sub> | Hydrazine              | 124               |
| 101         | N <sub>2</sub>                | Dinitrogen             | 125               |
| 102         | N <sub>2</sub> O              | Nitrous oxide          | 126               |
| 103         | N <sub>2</sub> O <sub>3</sub> | Dinitrogen trioxide*   | 127               |
| 104         | N <sub>2</sub> O <sub>4</sub> | Dinitrogen tetraoxide* | 128               |
| 105         | O <sub>3</sub>                | Ozone                  | 129               |
| 106         | H <sub>2</sub>                | Dihydrogen             | 130               |

Table 3: CBS extrapolated CCSD(T) correlation energies<sup>a)</sup> for linear HCN...HCN, HF dimer, ethyne dimer (T-shaped), and Ar-methane (systems #3, #4, #12 and #20 in A24, respectively) at their optimized CCSD(T) equilibrium geometries<sup>b)</sup> and separated-monomers<sup>c)</sup>.

| CBS ext. pair                                          | HCN dimer            |                           |                      | HF dimer             |                           |                      |
|--------------------------------------------------------|----------------------|---------------------------|----------------------|----------------------|---------------------------|----------------------|
|                                                        | $E_e^{\text{cor}d)}$ | $E_\infty^{\text{cor}e)}$ | $D_e^{\text{cor}f)}$ | $E_e^{\text{cor}d)}$ | $E_\infty^{\text{cor}e)}$ | $D_e^{\text{cor}f)}$ |
| CCSD(T)                                                |                      |                           |                      |                      |                           |                      |
| (d, t)                                                 | -0.8013002           | -0.8001526                | -0.720               | -0.6370521           | -0.6353949                | -1.040               |
| (d, q)                                                 | -0.8008283           | -0.7997567                | -0.672               | -0.6415298           | -0.6400659                | -0.919               |
| (t, q)                                                 | -0.8006320           | -0.7995920                | -0.653               | -0.6433931           | -0.6420095                | -0.868               |
| (d, 5)                                                 | -0.8004848           | -0.7994604                | -0.643               | -0.6438361           | -0.6424731                | -0.855               |
| (t, 5)                                                 | -0.8003688           | -0.7993620                | -0.632               | -0.6448007           | -0.6434795                | -0.829               |
| (q, 5)                                                 | -0.8002322           | -0.7992425                | -0.621               | -0.6455313           | -0.6442425                | -0.809               |
| (d, 6)                                                 | -0.8004195           | -0.7993834                | -0.650               | -0.6445631           | -0.6432336                | -0.834               |
| (t, 6)                                                 | -0.8003588           | -0.7993305                | -0.645               | -0.6450801           | -0.6437732                | -0.820               |
| (q, 6)                                                 | -0.8003047           | -0.7992786                | -0.644               | -0.6454145           | -0.6441227                | -0.810               |
| (5, 6)                                                 | -0.8003495           | -0.7993009                | -0.658               | -0.6453423           | -0.6440488                | -0.812               |
| $\langle CBS(x, 6) \rangle^g$                          | -0.8003581           | -0.7993234                | -0.649               | -0.6451000           | -0.6437946                | -0.819               |
| pCBS                                                   | -0.8003676           | -0.7993702                | -0.626               | -0.6459013           | -0.6446260                | -0.800               |
| CCSD(T)-F12a                                           |                      |                           |                      |                      |                           |                      |
| (d, t)                                                 | -0.7973798           | -0.7963312                | -0.658               | -0.6465005           | -0.6451507                | -0.847               |
| (d, q)                                                 | -0.7993468           | -0.7983000                | -0.657               | -0.6456660           | -0.6443392                | -0.833               |
| (t, q)                                                 | -0.7998818           | -0.7988355                | -0.657               | -0.6454390           | -0.6441185                | -0.829               |
| (d, 5)                                                 | -0.7996664           | -0.7986118                | -0.662               | -0.6459074           | -0.6445936                | -0.824               |
| (t, 5)                                                 | -0.7998355           | -0.7987805                | -0.662               | -0.6458635           | -0.6445524                | -0.823               |
| (q, 5)                                                 | -0.7998182           | -0.7987599                | -0.664               | -0.6460220           | -0.6447145                | -0.820               |
| pCBS                                                   | -0.8005017           | -0.7994560                | -0.656               | -0.6451760           | -0.6438627                | -0.824               |
| CCSD(T)-F12b                                           |                      |                           |                      |                      |                           |                      |
| (d, t)                                                 | -0.8002632           | -0.7992189                | -0.655               | -0.6465997           | -0.6452436                | -0.851               |
| (d, q)                                                 | -0.8001146           | -0.7990744                | -0.653               | -0.6461354           | -0.6448106                | -0.831               |
| (t, q)                                                 | -0.8000742           | -0.7990351                | -0.652               | -0.6460091           | -0.6446928                | -0.826               |
| (d, 5)                                                 | -0.7998983           | -0.7988437                | -0.662               | -0.6460217           | -0.6447025                | -0.828               |
| (t, 5)                                                 | -0.7998713           | -0.7988160                | -0.662               | -0.6459789           | -0.6446624                | -0.810               |
| (q, 5)                                                 | -0.7997956           | -0.7987341                | -0.666               | -0.6459676           | -0.6446511                | -0.810               |
| pCBS                                                   | -0.8000274           | -0.7989896                | -0.651               | -0.6458628           | -0.6445563                | -0.810               |
| C <sub>2</sub> H <sub>2</sub> dimer (C <sub>2v</sub> ) |                      |                           |                      |                      |                           |                      |
| Ar-methane                                             |                      |                           |                      |                      |                           |                      |
| CBS ext. pair                                          | $E_e^{\text{cor}d)}$ | $E_\infty^{\text{cor}e)}$ | $D_e^{\text{cor}f)}$ | $E_e^{\text{cor}d)}$ | $E_\infty^{\text{cor}e)}$ | $D_e^{\text{cor}f)}$ |
| CCSD(T)                                                |                      |                           |                      |                      |                           |                      |
| (d, t)                                                 | -0.7359935           | -0.7344587                | -0.963               | -0.5143765           | -0.5135106                | -0.543               |
| (d, q)                                                 | -0.7338925           | -0.7322838                | -1.010               | -0.5139311           | -0.5130278                | -0.567               |
| (t, q)                                                 | -0.7330182           | -0.7313787                | -1.029               | -0.5130428           | -0.5120820                | -0.603               |
| (d, 5)                                                 | -0.7325314           | -0.7309106                | -1.017               | -0.5141176           | -0.5131458                | -0.643               |
| (t, 5)                                                 | -0.7320392           | -0.7304061                | -1.025               | -0.5137458           | -0.5128270                | -0.610               |
| (q, 5)                                                 | -0.7315310           | -0.7299013                | -1.023               | -0.5128532           | -0.5118789                | -0.611               |
| (d, 6)                                                 | -0.7321145           | -0.7304842                | -1.023               | -0.5140997           | -0.5131207                | -0.614               |
| (t, 6)                                                 | -0.7318475           | -0.7302106                | -1.027               | -0.5123899           | -0.5113868                | -0.629               |
| (q, 6)                                                 | -0.7316155           | -0.7299791                | -1.027               | -0.5141699           | -0.5131789                | -0.621               |
| (5, 6)                                                 | -0.7316676           | -0.7300272                | -1.029               | -0.5152695           | -0.5142860                | -0.617               |
| $\langle CBS(x, 6) \rangle^g$                          | -0.7318113           | -0.7301753                | -1.027               | -0.5144142           | -0.5134329                | -0.616               |
| pCBS                                                   | -0.7318413           | -0.7301604                | -1.055               | -0.5134963           | -0.5125565                | -0.590               |
| CCSD(T)-F12a                                           |                      |                           |                      |                      |                           |                      |
| (d, t)                                                 | -0.7286123           | -0.7268782                | -1.088               | -0.5132348           | -0.5122754                | -0.602               |
| (d, q)                                                 | -0.7305188           | -0.7288844                | -1.026               | -0.5141489           | -0.5131788                | -0.609               |
| (t, q)                                                 | -0.7307085           | -0.7290787                | -1.023               | -0.5142002           | -0.5132201                | -0.615               |
| (d, 5)                                                 | -0.7310374           | -0.7294302                | -1.009               | -0.5143976           | -0.5134246                | -0.610               |
| (t, 5)                                                 | -0.7308636           | -0.7292415                | -1.018               | -0.5142716           | -0.5132900                | -0.616               |
| (q, 5)                                                 | -0.7307986           | -0.7291710                | -1.021               | -0.5142246           | -0.5132397                | -0.618               |
| pCBS                                                   | -0.7316382           | -0.7300623                | -0.989               | -0.5146856           | -0.5137092                | -0.613               |
| CCSD(T)-F12b                                           |                      |                           |                      |                      |                           |                      |
| (d, t)                                                 | -0.7313294           | -0.7296198                | -1.073               | -0.5132713           | -0.5123008                | -0.609               |
| (d, q)                                                 | -0.7311866           | -0.7295546                | -1.024               | -0.5142654           | -0.5132955                | -0.609               |
| (t, q)                                                 | -0.7309066           | -0.7292769                | -1.023               | -0.5142256           | -0.5132446                | -0.616               |
| (d, 5)                                                 | -0.7311478           | -0.7295369                | -1.011               | -0.5145358           | -0.5135661                | -0.608               |
| (t, 5)                                                 | -0.7308753           | -0.7292515                | -1.019               | -0.5142962           | -0.5133144                | -0.616               |
| (q, 5)                                                 | -0.7307736           | -0.7291449                | -1.022               | -0.5142068           | -0.5132204                | -0.619               |
| pCBS                                                   | -0.7311028           | -0.7295164                | -0.996               | -0.5148490           | -0.5138796                | -0.608               |

<sup>a)</sup>Energies in  $E_h$ , except for  $D_e^{\text{cor}}$  that are in  $\text{kcal mol}^{-1}$ . <sup>b)</sup>All optimizations employed a VTZ basis set, except for the HF dimer where a VQZ basis set was employed (see Figures 1 and 2 of this SI). Optimized distances (in  $\text{\AA}$ ) for the HCN dimer are  $R_{\text{HC}}=1.0679$ ,  $R_{\text{CN}}=1.1584$ ,  $R_{\text{NH}}=2.2138$ ,  $R_{\text{HC}}=1.0728$ , and  $R_{\text{CN}}=1.1606$ ; the valence angles were constrained at 0 deg, and the dihedrals at 180 deg. For (HF)<sub>2</sub>, the geometry has been fully optimized, with the dimer broken apart keeping all but one (the nearest distance from H of one monomer to the F of the other) coordinates frozen at the equilibrium values. For the C<sub>2</sub>H<sub>2</sub> dimer, the T-shaped equilibrium geometry was fully optimized at CCSD(T)/VTZ level. For Ar-methane, the only optimized coordinates were  $R_{\text{CH}_i}=1.0890$  ( $i=1-4$ ) and  $R_{\text{CO}}=3.5882$ , with the angles inactive at their values in A24. <sup>c)</sup>The monomers were considered as separated when distant apart by  $10^3$ . <sup>d)</sup>Correlation energy at equilibrium. <sup>e)</sup>Correlation energy for separated monomers. <sup>f)</sup>Dissociation energy. <sup>g)</sup>Average value, see text.

xyz coordinates and vibrational frequencies for the HF dimer at its optimized geometry and CCSD(T)/VQZ level of theory:

```
4
RCCSD(T)/VQZ ENERGY=-200.75416677
H      0.0000000000      0.0000000000      0.0000000000
F      0.0000000000      0.0000000000      0.9194848541
H      0.0000000000      1.6749342253      1.6260755440
F      0.0063728969      2.5783749829      1.8091273760
```

| Low Vibration | Wavenumber |
|---------------|------------|
| Nr            | [1/cm]     |
| 1             | 0.00       |
| 2             | 0.00       |
| 3             | 0.00       |
| 4             | 0.00       |
| 5             | 0.00       |
| 6             | 0.00       |

| Vibration | Wavenumber |
|-----------|------------|
| Nr        | [1/cm]     |
| 1         | 161.53     |
| 2         | 217.53     |
| 3         | 471.02     |
| 4         | 579.61     |
| 5         | 4048.26    |
| 6         | 4120.28    |

Figure 1: The HF dimer at its optimized geometry and CCSD(T)/VQZ level of theory

xyz coordinates and vibrational frequencies for the ethyne dimer at its optimized geometry at CCSD(T)/VTZ level of theory:

```

8
RCCSD(T)/VTZ ENERGY=-154.37763758
C      0.0000000000    0.0000000000    0.0000000000
H      0.0000000000    0.0000000000    1.0642250961
C      0.0000000000    0.0007225296    -1.2104815698
H      0.0001288060    0.0017780842    -2.2746985231
C     -1.9685941093   -3.2216710162    -0.6405744488
H     -1.4134749593   -2.3121314488    -0.6165865682
C     -2.5991624530   -4.2547554471    -0.6677846183
H     -3.1529935381   -5.1624474241    -0.6918492403

```

| Low Vibration | Wavenumber |
|---------------|------------|
| Nr            | [1/cm]     |
| 1             | 0.00       |
| 2             | 0.00       |
| 3             | 0.00       |
| 4             | 0.00       |
| 5             | 0.00       |
| 6             | 0.00       |
| 7             | 42.11      |

| Vibration | Wavenumber |
|-----------|------------|
| Nr        | [1/cm]     |
| 1         | 60.27      |
| 2         | 70.46      |
| 3         | 104.80     |
| 4         | 573.15     |
| 5         | 578.64     |
| 6         | 585.06     |
| 7         | 595.88     |
| 8         | 745.10     |
| 9         | 752.38     |
| 10        | 761.25     |
| 11        | 774.60     |
| 12        | 1993.75    |
| 13        | 1996.36    |
| 14        | 3393.35    |
| 15        | 3404.80    |
| 16        | 3499.23    |
| 17        | 3504.63    |

Figure 2: The ethyne dimer at its optimized geometry and CCSD(T)/VQZ level of theory
